# Supplementary material
Source: PubMed Central journal article supplement (PMC5484758)
Supplement: NIHMS843587-supplement-Supplemental.pdf [file NIHMS843587-supplement-Supplemental.pdf]

**Table 1.** Summary of clinicopathological data.

ABC score indicates the score provide for A $\beta$  deposition (A), for Braak stage of neurofibrillary degeneration (B), and neuritic plaque score (C)(28). PSP: progressive supranuclear palsy; MCI: mild cognitive impairment.

|                             | <b>Case-1</b>                                                        | <b>Case-2</b>                                                                        | <b>Case-3</b>         |
|-----------------------------|----------------------------------------------------------------------|--------------------------------------------------------------------------------------|-----------------------|
| Age at death (years)        | 83                                                                   | 72                                                                                   | 91                    |
| Sex                         | male                                                                 | female                                                                               | female                |
| Duration of illness (years) | 20                                                                   | 5                                                                                    | 20                    |
| Clinical diagnosis          | PSP+ MCI                                                             | PSP+dementia                                                                         | Unclassified dementia |
| Symptoms at early stage     | Imbalance and gait disorder                                          | Incoordination                                                                       | Not available         |
| Symptoms at late stage      | Cognitive decline<br>Supranuclear gaze palsy<br>2 grand mal seizures | Cognitive decline<br>Supranuclear gaze palsy<br>Parkinsonism                         | Cognitive decline     |
| Motor-Dementia interval     | 15 years                                                             | 0 years                                                                              | 0 years               |
| Family history              | no                                                                   | no                                                                                   | yes                   |
| ApoE                        | E2/E3                                                                | E3/E3                                                                                | E2/E3                 |
| H1/H2 haplotype             | H1/H1                                                                | H1/H1                                                                                | H2/H2                 |
| <i>MAPT</i> mutation        | none                                                                 | none                                                                                 | none                  |
| Brain weight                | 1378                                                                 | 1147                                                                                 | 1066                  |
| ABC score                   | A0B2C0                                                               | A1B1C0                                                                               | A3B3C3                |
| pTDP-43                     | no                                                                   | no                                                                                   | yes                   |
| $\alpha$ -synuclein         | no                                                                   | no                                                                                   | no                    |
| Hippocampal sclerosis       | no                                                                   | yes                                                                                  | yes                   |
| Other                       | -                                                                    | Focal encephalitis in brainstem<br>Lacunar infarcts in Globus pallidus and brainstem | -                     |

**Table 2.** Anatomical distribution of neuronal (NFT: neurofibrillary tangle; PT: pretangle; SB: spherical body), astroglial (AG), and oligodendroglial (OG; in the adjacent white matter) tau pathologies. – indicates none; + : occasional; ++ moderate number; +++: abundant/many. \* indicates thorn shaped astrocytes in the white matter; TA: tufted astrocytes; RA: ramified astrocytes; GFA: granular/fuzzy astrocytes; subthal: subthalamic nucleus

| Region/Pathology     | Case-1 |     |                       |     | Case-2 |    |                   |     | Case-3 |     |                     |    |
|----------------------|--------|-----|-----------------------|-----|--------|----|-------------------|-----|--------|-----|---------------------|----|
|                      | NFT/PT | SB  | AG                    | OG  | NFT/PT | SB | AG                | OG  | NFT/PT | SB  | AG                  | OG |
| Frontal              | +      | -   | + <sup>TA</sup>       | +   | +      | -  | +++ <sup>TA</sup> | +   | ++     | -   | -                   | +  |
| Temporal             | +      | -   | -                     | -   | +      | -  | +++ <sup>TA</sup> | ++  | +++    | -   | -                   | +  |
| Parietal             | -      | -   | -                     | -   | -      | -  | +++ <sup>TA</sup> | ++  | ++     | -   | +*                  | +  |
| Anterior cingulate   | ++     | -   | + <sup>TA</sup>       | +   | +      | -  | +++ <sup>TA</sup> | ++  | ++     | -   | -                   | +  |
| Entorhinal           | +++    | -   | + <sup>TA</sup>       | +   | +      | -  | +++ <sup>TA</sup> | +   | +++    | -   | -                   | -  |
| Hippocampus          |        |     |                       |     |        |    |                   |     |        |     |                     |    |
| CA1/Subiculum        | +++    | +   | ++ <sup>TA</sup>      | +++ | +      | +  | +++ <sup>TA</sup> | ++  | +++    | +   | + <sup>TA/RA</sup>  | +  |
| CA2/3                | +++    | +   | +++ <sup>TA</sup>     | +++ | +      | +  | +++ <sup>TA</sup> | -   | +++    | +   | ++ <sup>TA/RA</sup> | +  |
| CA4                  | ++     | -   | +++ <sup>TA</sup>     | -   | +      | -  | +++ <sup>TA</sup> | -   | +      | -   | ++ <sup>TA/RA</sup> | -  |
| Dentate gyrus        | +      | +++ | ++ <sup>TA/TSA</sup>  | -   | +      | ++ | ++ <sup>TA</sup>  | -   | +      | +++ | + <sup>TA/RA</sup>  | -  |
| Amygdala             | +++    | -   | +++ <sup>TA/GFA</sup> | +++ | +++    | +  | +++ <sup>TA</sup> | ++  | +++    | -   | ++ <sup>GFA</sup>   | +  |
| Striatum             | ++     | -   | +++ <sup>TA</sup>     | +   | +      | -  | +++ <sup>TA</sup> | +   | +      | -   | -                   | -  |
| Globus pallidus      | +      | -   | ++ <sup>TA</sup>      | +++ | ++     | -  | + <sup>TA</sup>   | +++ | -      | -   | -                   | -  |
| Thalamus+Subthal     | ++     | -   | -                     | +   | ++     | -  | +++ <sup>TA</sup> | +++ | ++     | -   | -                   | -  |
| Substantia nigra     | ++     | -   | -                     | -   | +++    | -  | + <sup>TA</sup>   | +++ | +      | -   | -                   | -  |
| Locus coeruleus      | +++    | -   | -                     | -   | +      | -  | -                 | +   | ++     | -   | -                   | -  |
| Pontine base         | -      | -   | -                     | +   | +      | -  | -                 | +++ | -      | -   | -                   | +  |
| Inferior olives      | +++    | -   | -                     | -   | +      | -  | -                 | +   | -      | -   | -                   | -  |
| Hypoglossal nucleus  | -      | -   | -                     | -   | -      | -  | -                 | -   | -      | -   | -                   | -  |
| Dorsal vagus nucleus | ++     | -   | -                     | -   | -      | -  | -                 | -   | -      | -   | -                   | -  |
| Dentate nucleus      | ++     | -   | -                     | -   | +++    | -  | -                 | +   | -      | -   | -                   | -  |

### **Figure legends**

**Figure 1.** Basophilic inclusions in the dentate gyrus (A-C; indicated by arrowheads) and variable cell loss in the CA1 subregion (D-F) in the three cases (A,D: case 1; B, E: case 2; C, F: case3) reported in this study. Immunostaining for PHF-1 (G-I), 4R tau (J-L), 3R tau (M-P), p62 (Q-S) and for Gallyas silver staining (T-V) in cases 1 (G, J, M, N, Q, T), 2 (H, K, O, R, U) and 3 (I, L, Q, P, S, V) demonstrating the spherical inclusions in the dentate gyrus. Immunostaining for 3R tau in the CA1 subregion (N) demonstrates neurofibrillary tangles in case 1 corresponding to the immunoblot results. Note the argyrophilic astrocytes in T-V (arrows). The bar in A represents 25  $\mu\text{m}$  for A-C, G-V and 100  $\mu\text{m}$  for D-F.

**Figure 2.** Immunostaining for PHF-1 in the CA1 (A-C), CA4 (D-F) subregions, amygdala (G-I), frontal cortex (J-L) and putamen (M-O) in cases 1 (A, D, G, J, M), 2 (B, E, H, K, N) and 3 (C, F, I, L, O). Note the numerous tau positive astrocytes in case 2 in all subregions, while less are seen in case 1 together with neurofibrillary tangles in the CA1 subregion. Case 3 exhibits neurofibrillary tangles and dystrophic neuritic plaques together with astrocytes in CA subregions and amygdala (\* in image I indicates white matter in amygdala with thorn shaped astrocytes compatible with ARTAG). The bar in A represents 40  $\mu\text{m}$  for A and 100  $\mu\text{m}$  for B-O.

**Figure 3.** Biochemical analysis of tau in Triton X-100 insoluble fraction extracted from frozen brain tissues. (A) Total-tau (17025) and (B) phosphorylated-tau (PHF-1) immunoblot showed abundance of tau pathology in Case-1 and Case-2 Hp, but not in Case-1 Pu. Isoform specific immunoblot revealed predominant 4R-tau pathology in both cases (C) consistent with IHC finding. Further, Case-1 Hp was also immune-reactive to 3R-tau antibody (d). Hp = hippocampus, Pu = putamen; Alzheimer disease (AD), corticobasal degeneration (CBD), and Pick's disease (PiD) control samples are also shown.

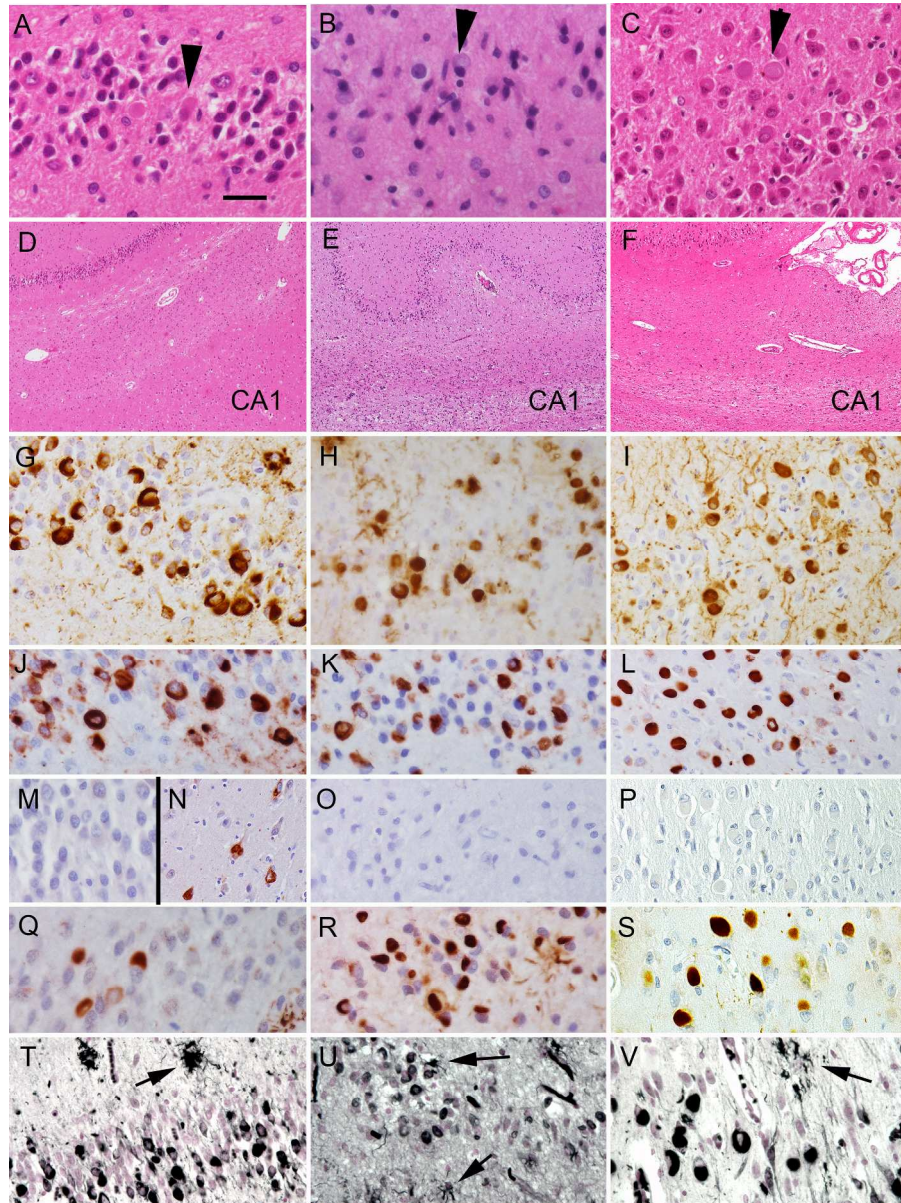

Figure 1. Basophilic inclusions in the dentate gyrus (A-C; indicated by arrowheads) and variable cell loss in the CA1 subregion (D-F) in the three cases (A,D: case 1; B, E: case 2; C, F: case3) reported in this study. Immunostaining for PHF-1 (G-I), 4R tau (J-L), 3R tau (M-P), p62 (Q-S) and for Gallyas silver staining (T-V) in cases 1 (G, J, M, N, Q, T), 2 (H, K, O, R, U) and 3 (I, L, Q, P, S, V) demonstrating the spherical inclusions in the dentate gyrus. Immunostaining for 3R tau in the CA1 subregion (N) demonstrates neurofibrillary tangles in case 1 corresponding to the immunoblot results. Note the argyrophilic astrocytes in T-V (arrows). The bar in A represents 25  $\mu$ m for A-C, G-V and 100  $\mu$ m for D-F.

209x279mm (300 x 300 DPI)

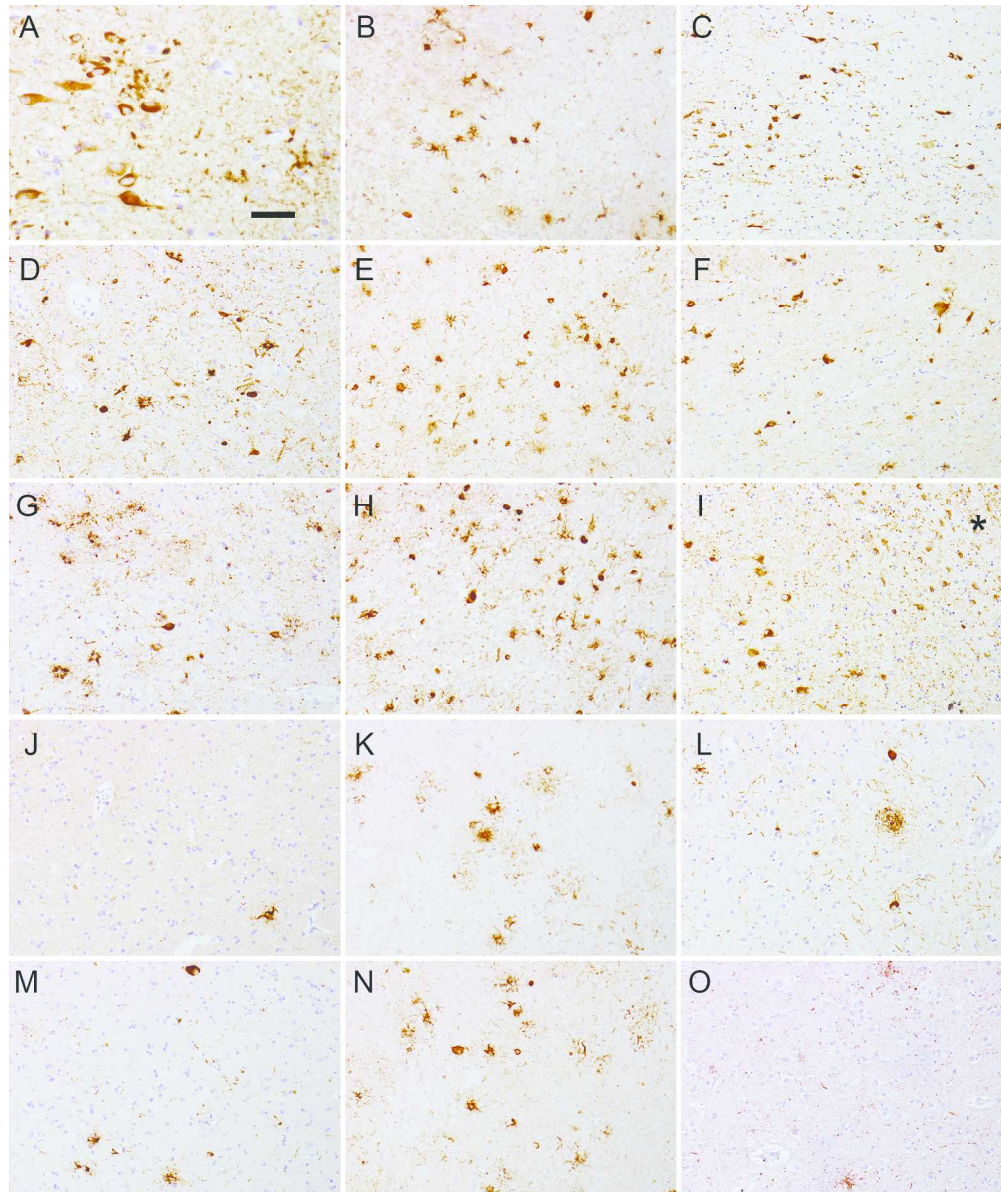

Figure 2. Immunostaining for PHF-1 in the CA1 (A-C), CA4 (D-F) subregions, amygdala (G-I), frontal cortex (J-L) and putamen (M-O) in cases 1 (A, D, G, J, M), 2 (B, E, H, K, N) and 3 (C, F, I, L, O). Note the numerous tau positive astrocytes in case 2 in all subregions, while less are seen in case 1 together with neurofibrillary tangles in the CA1 subregion. Case 3 exhibits neurofibrillary tangles and dystrophic neuritic plaques together with astrocytes in CA subregions and amygdala (\* in image I indicates white matter in amygdala with thorn shaped astrocytes compatible with ARTAG). The bar in A represents 40  $\mu$ m for A and 100  $\mu$ m for B-O.

209x250mm (300 x 300 DPI)

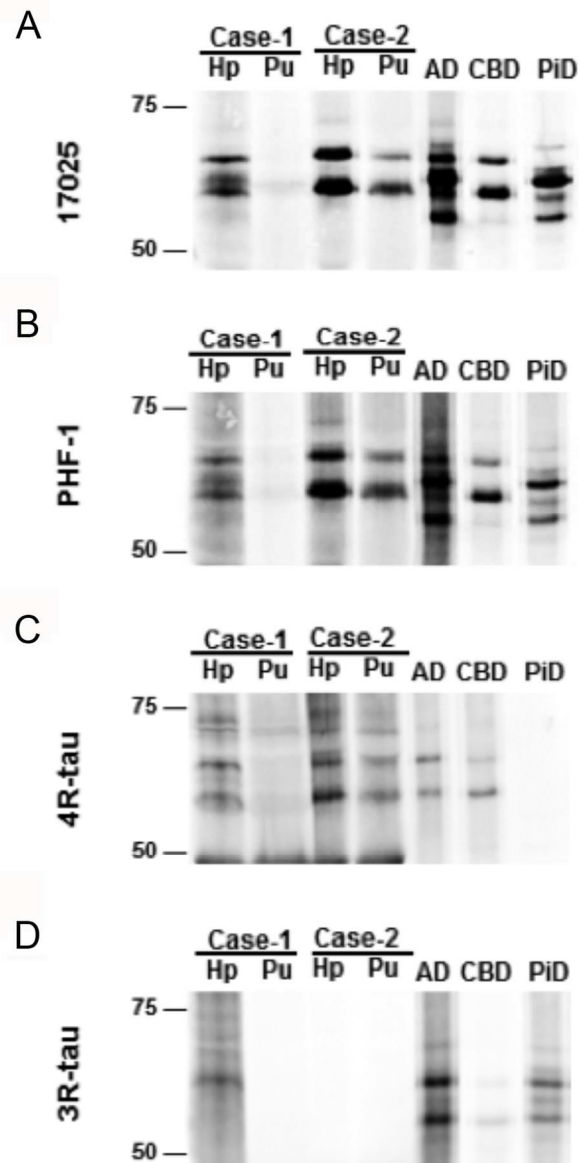

Figure 3. Biochemical analysis of tau in Triton X-100 insoluble fraction extracted from frozen brain tissues. (A) Total-tau (17025) and (B) phosphorylated-tau (PHF-1) immunoblot showed abundance of tau pathology in Case-1 and Case-2 Hp, but not in Case-1 Pu. Isoform specific immunoblot revealed predominant 4R-tau pathology in both cases (C) consistent with IHC finding. Further, Case-1 Hp was also immune-reactive to 3R-tau antibody (d). Hp = hippocampus, Pu = putamen; Alzheimer disease (AD), corticobasal degeneration (CBD), and Pick's disease (PiD) control samples are also shown.

99x199mm (300 x 300 DPI)
